# Supplementary material for: Sustained synchronized neuronal network activity in a human astrocyte co-culture system
Source: PubMed Central journal article supplement (PMC5098163; doi:10.1038/srep36529), 2016-11-07
Supplement: srep36529-s1.pdf [file srep36529-s1.pdf]

# **Sustained synchronized neuronal network activity in a human astrocyte co-culture system**

Jacobine Kuijlaars<sup>a</sup>, Tutu Oyelami<sup>b</sup>, Annick Diels<sup>b</sup>, Jutta Rohrbacher<sup>b</sup>, Sofie Versweyveld<sup>b</sup>, Giulia Meneghello<sup>b</sup>, Marianne Tuefferd<sup>b</sup>, Peter Verstraelen<sup>c</sup>, Jan R. Detrez<sup>c</sup>, Marlies Verschuuren<sup>c</sup>, Winnok H. De Vos<sup>c,d</sup>, Theo Meert<sup>a,b</sup>, Pieter J. Peeters<sup>b</sup>, Miroslav Cik<sup>b</sup>, Rony Nuydens<sup>b</sup>, **Bert Brône<sup>at</sup>**, **An Verheyen<sup>b+\*</sup>**

a. Hasselt University, Biomedical Research Institute, Diepenbeek, B-3590, Belgium

b. Janssen Research & Development, a division of Janssen Pharmaceutica N.V, Beerse, B-2340, Belgium

c. Antwerp University, Department of Veterinary Science, Antwerp, B-2020, Belgium

d. Ghent University, Department of Molecular Biotechnology, Ghent, B-9000, Belgium

**+ Equal contribution**

\* Corresponding author:

An Verheyen, PhD

Janssen R&D

Turnhoutseweg 30

2340 Beerse, Belgium

[averhey1@its.inj.com](mailto:averhey1@its.inj.com)

## Supplementary Figure S1. Primary human astrocytes lose primary cell identity

**over several passages** a) Immunocytochemistry for astrocyte markers GFAP and S100B shows a decrease in marker expression over increasing number of passages of primary human astrocytes. Astrocyte markers are shown in orange and DAPI (nuclei) in blue. b) Micro-array data show a decrease in expression of GFAP and S100B over increasing number of passages of primary human astrocytes. Each datapoint represents 1 biological replicate from the same plate (n = 3).

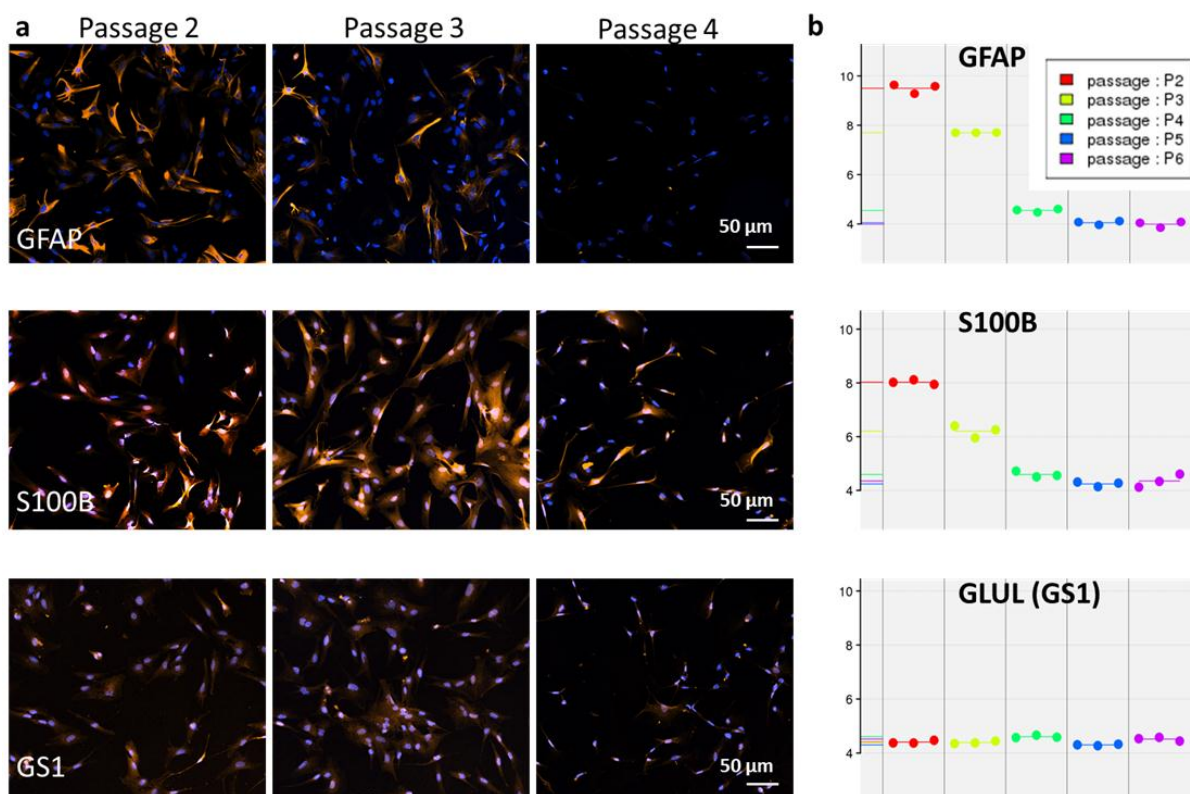

## Methods

### *RNA extraction and microarray analyses*

RNA extraction was performed using the RNeasy mini kit (Qiagen). cDNA targets were prepared and labelled using the IVT express kit and then hybridized on Affymetrix<sup>®</sup> Human Genome U219 array plate in the GeneTitan<sup>®</sup> instrument

(Affymetrix) according to the manufacturer's protocol. Microarray analysis was performed using the Bioconductor package version 2.12 (working with R version 3.0.1) <sup>1</sup>. Target transcripts of probes were annotated using Entrez Gene based alternative cdf version 15.1.0 <sup>2</sup>, assigning probes to 18567 unique transcripts. RMA algorithm was used for pre-processing <sup>3</sup>.

## References

- 1 Gentleman, R. C. *et al.* Bioconductor: open software development for computational biology and bioinformatics. *Genome Biol.* **5**, R80 (2004).
- 2 Dai, M. *et al.* Evolving gene/transcript definitions significantly alter the interpretation of GeneChip data. *Nucleic Acids Res.* **33**, e175-e175 (2005).
- 3 Irizarry, R. A. *et al.* Exploration, normalization, and summaries of high density oligonucleotide array probe level data. *Biostatistics* **4**, 249-264 (2003).

**Supplementary Figure S2. Primary rodent astrocytes induce synchronized neuronal calcium oscillations in human cortical neurons** a) hiPSCs

differentiated towards cortical neurons in co-culture with primary rat astrocytes are stained with neuronal marker class III  $\beta$ -tubulin (TUBB3), astrocyte marker GFAP and nuclear marker DAPI. b) Co-cultures of hiPSC-derived cortical neurons with primary rat astrocytes (+ DAPT) have been compared to fully human co-cultures and monocultures. Rat co-cultures show an increased percentage of active neurons (Two-way ANOVA,  $p < 0.0001$ ), bursting frequency (Two-way ANOVA,  $p < 0.0001$ ) and synchronization (Two-way ANOVA,  $p < 0.0001$ ) of neuronal calcium oscillations compared to monocultures over a time course of 2 – 5 weeks. When comparing rat and human co-cultures, there is a significant increase in the percentage of active neurons (wk2), bursting frequency (wk2) and correlation score (wk2 and wk3) at early time points, while there is a significant decrease in the amount of active neurons at the latest time point measured (wk 5). The comparison between monocultures and human co-cultures is shown in Figure 3b.  $n \geq 3$  from  $\geq 2$  differentiations, mean  $\pm$  SEM. \*  $p < 0.05$ , \*\*  $p < 0.01$ , \*\*\* $p \leq 0.0001$ .

**a**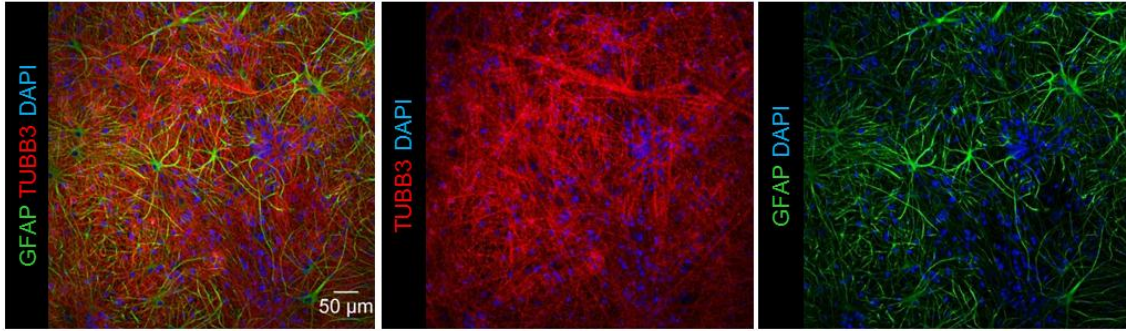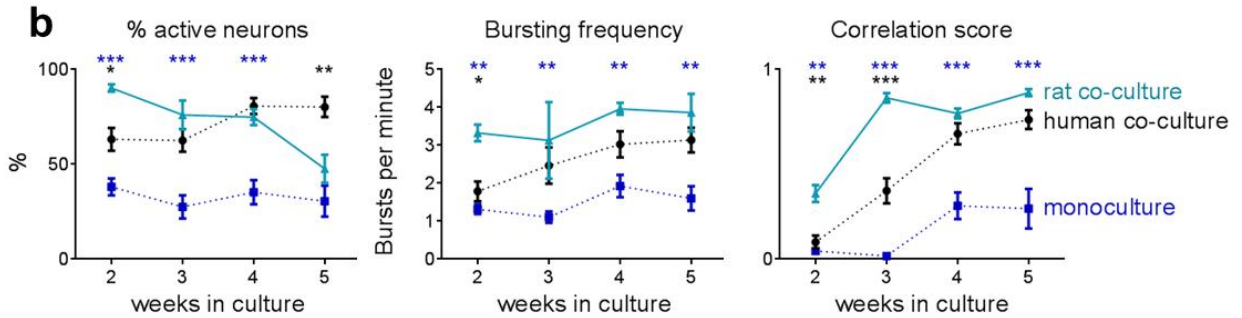

## Methods

### ***Cell culture conditions - primary rat astrocytes***

Cerebral cortices from E18-19 Wistar rat embryos were dissected in HEPES (7 mM, Sigma) -buffered Hanks Balanced Salt Solution (HBSS) and cells were dissociated enzymatically with trypsin and mechanically triturated through two fire-polished glass pipettes with decreasing diameter. After centrifugation the pellet was resuspended in Minimal Essential Medium (MEM) supplemented with 10% heat-inactivated normal horse serum and 30 mM glucose (Merck) (MEM-horse medium). Cells were grown in cell culture flasks in MEM-horse medium for 12 – 14 days with medium changes every 2 - 3 days. With every medium change loosely attached cells were dislodged and removed. All cell culture supplies were purchased from Thermo Fisher Scientific, unless stated otherwise.

## ***Statistics***

For calcium imaging experiments overall differences between groups were calculated using two-way ANOVAs considering equal variances. For multiple comparisons, Dunnett's t tests were performed to detect differences compared to rat co-cultures.
